# Supplementary material for: Z-ajoene from Crushed Garlic Alleviates Cancer-Induced Skeletal Muscle Atrophy
Source: PubMed Central journal article supplement (PMC6893518; doi:10.3390/nu11112724), 2019-11-10
Supplement: nutrients-11-02724-s001.pdf [file nutrients-11-02724-s001.pdf]

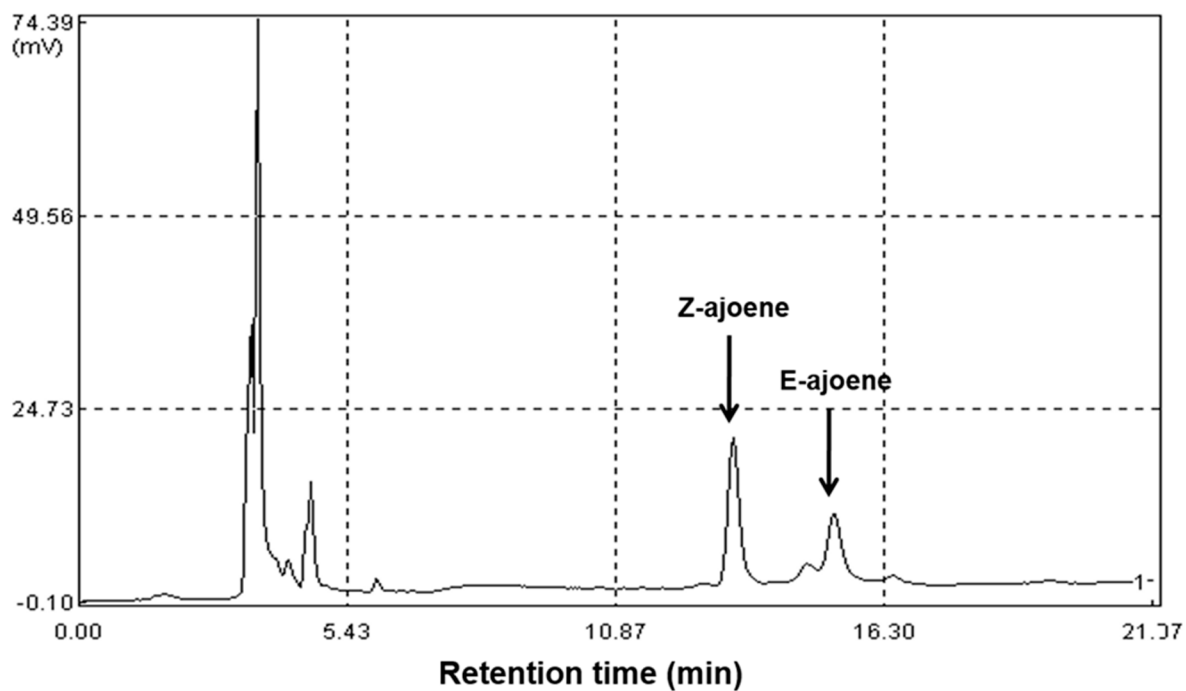

**Figure 1. Chromatogram of ajoene extract in high performance liquid chromatography (HPLC).** HPLC conditions are as follows, column: Spherisorb silica, 5  $\mu\text{m}$ , 4.6 $\times$ 250 mm, eluent: n-hexane/10% iso-propyl alcohol in ethyl acetate (67/33) 1 ml/min, detection 254 nm UV.

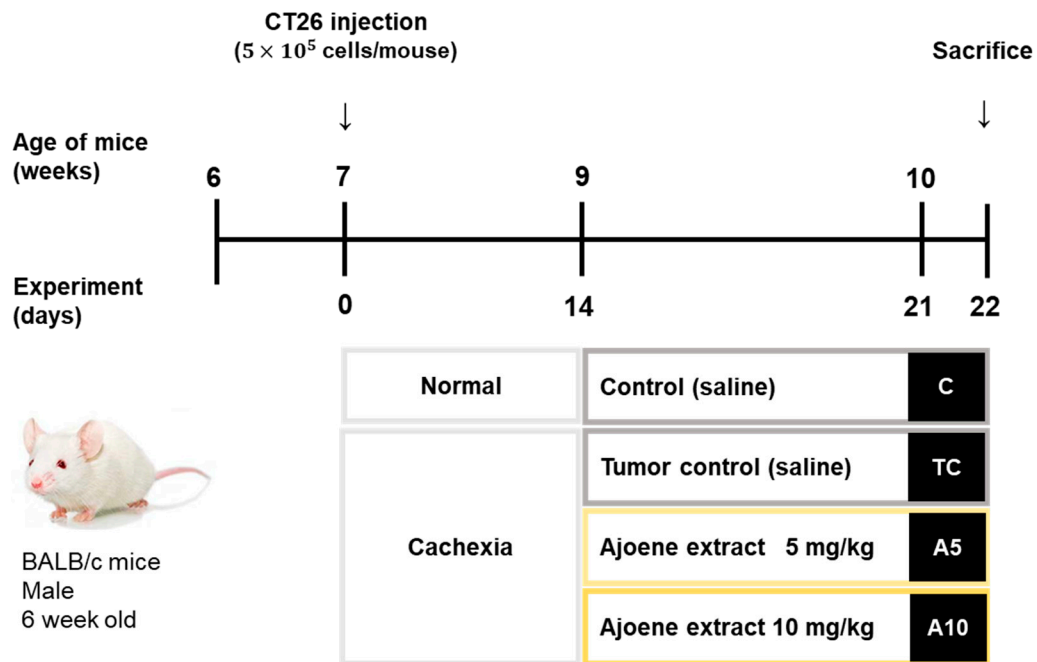

**Figure 2.** Experimental design of mouse model of cancer cachexia.

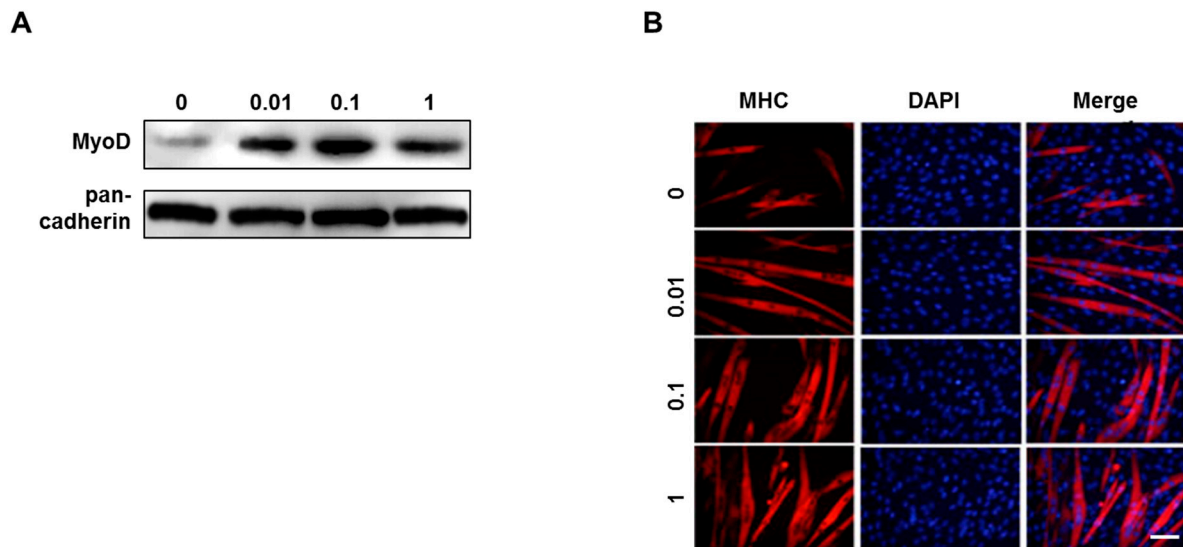

**Figure 3.** Effect of ajoene extract on myoblast differentiation. C2C12 cells were differentiated using differentiation medium (DM) supplemented with ajoene extract (0.01, 0.1, or 1  $\mu\text{g/mL}$ ) for 3 days, and then cells were collected to perform Western blotting analysis to determine the level of myoD expression (A) and immunostaining of MHC (red) and 4',6-diamidino-2-phenylindole (DAPI, blue) (B). Scale bar = 200  $\mu\text{m}$ .

**Table 1.** Oligonucleotide primer sequences used for the real-time quantitative polymerase chain reaction (qRT-PCR) analysis.

| Gene            | Forward Primer               | Reverse Primer               | Accession Number   |
|-----------------|------------------------------|------------------------------|--------------------|
| <i>In vitro</i> |                              |                              |                    |
| <i>MAFbx</i>    | CGACCTGCCTGTGTGCTTAC         | CTTGCGAATCTGCCTCTCTG         | BC027211           |
| <i>MuRF1</i>    | GGTGCCTACTTGCTCCTTGT         | CTGGTGGCTATTCTCCTTGG         | NC_000070          |
| <i>GAPDH</i>    | TGCACCACCAACTGCTTAG          | GGCATGGACTGTGGTCATGA<br>G    | BC096042           |
| <i>In vivo</i>  |                              |                              |                    |
| <i>FoxO1</i>    | CAAAGTACACATACGGCCAA<br>TCC  | CGTAACTTGATTTGCTGTCCT<br>GAA | NM_019739.3        |
| <i>IL-6</i>     | TTTCCTCTGGTCTTCTGGAGT        | GTGACTCCAGCTTATCTCTT<br>G    | NM_00131114<br>4.1 |
| <i>IL-6R</i>    | ATGATGCCTTGCAGGAGTG          | TGGGCTCTATCCAAGGAGTG         | NM_00131067<br>6.1 |
| <i>Jak</i>      | GGAGTACTACACAGTCAAGG<br>ACGA | AAACATTCCGGAGCGTACC          | NM_013567.1        |
| <i>MAFbx</i>    | AGTGAGGACCGGCTACTGTG         | GATCAAACGCTTGCGAATCT         | NM_026346.3        |
| <i>Mstn</i>     | CAGACCCGTCAAGACTCCTAC<br>A   | CAGTGCCTGGGCTCATGTCA<br>AG   | NM_010834.3        |
| <i>MuRF1</i>    | TGACATCTACAAGCAGGAGT<br>GC   | TCGTCTTCGTGTTTCCTTGC         | NM_00136924<br>5.1 |
| <i>Myh</i>      | CTCAGGCTTCAAGATTTGGTG<br>G   | TTGTGCCTCTCTTCGGTCATT<br>C   | NM_00103954<br>5.2 |
| <i>MyoD</i>     | AAACCCCAATGCGATTTATCA<br>GG  | TAAGCTTCATCTTTTGGGCGT<br>GA  | NM_010866          |
| <i>Smad2</i>    | AAGCCATCACCCTCAGAATT<br>G    | CACTGATCTACCGTATTTGC<br>TGT  | XM_006525699<br>.2 |
| <i>Smad3</i>    | GGGGAGCAGAGTACAGGAGA         | CTGCAAGGGTCCATTCAGGT         | NM_016769.4        |
| <i>Smad4</i>    | AAGGTGGGGAAAGTAAAC           | ATGCTTTAGTTCATTCTTGTG        | NM_00136496<br>8.1 |
| <i>Stat3</i>    | TTTCATCAGCAAGGAGCGGG         | GGGGTAGAGGTAGACAAGT<br>GGA   | NM_011486.5        |
| <i>GAPDH</i>    | CAACTTTGGCATTGTGGAAG         | CTGCTTCACCACCTTCTTG          | NM_00128972<br>6.1 |

*FoxO1*, forkhead box protein O1; *IL-6*, interleukin 6; *IL-6R*, interleukin 6 receptor; *Jak*, janus kinase; *MAFbx*, muscle atrophy F-box (MAFbx/atrogen-1); *Mstn*, myostatin; *MuRF1*, muscle-specific RING finger protein-1; *Myh*, myosin heavy chain; *MyoD*, myoblast determination protein 1; *Smad2*, SMAD family member 2; *Smad3*, SMAD family member 3; *Smad4*, SMAD family member 4; *GAPDH*, glyceraldehyde 3-phosphate dehydrogenase.
